# Supplementary material
Source: PubMed Central journal article supplement (PMC4830915)
Supplement: NIHMS773492-supplement-Figure_Flow.pdf [file NIHMS773492-supplement-Figure_Flow.pdf]

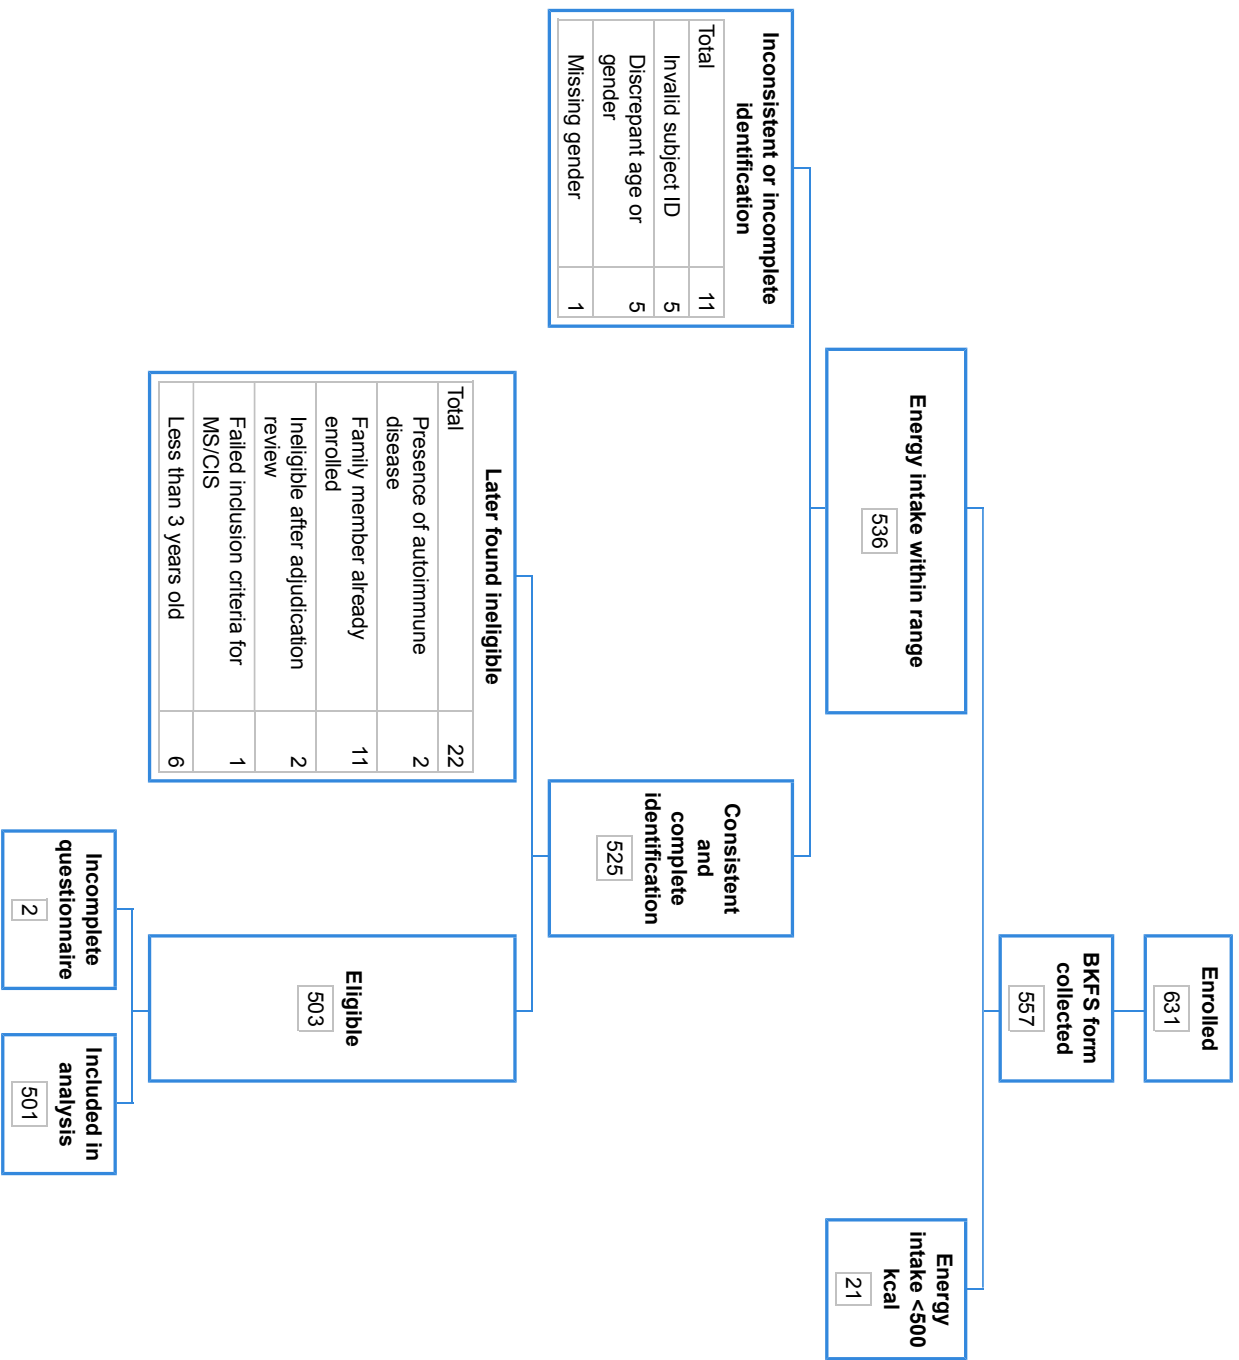

**Enrolled**  
631

**BKFS form collected**  
557

**Energy intake < 500 kcal**  
21

**Energy intake within range**  
536

**Inconsistent or incomplete identification**

|                          |    |
|--------------------------|----|
| Total                    | 11 |
| Invalid subject ID       | 5  |
| Discrepant age or gender | 5  |
| Missing gender           | 1  |

**Consistent and complete identification**  
525

**Later found ineligible**

|                                      |    |
|--------------------------------------|----|
| Total                                | 22 |
| Presence of autoimmune disease       | 2  |
| Family member already enrolled       | 11 |
| Ineligible after adjudication review | 2  |
| Failed inclusion criteria for MS/CIS | 1  |
| Less than 3 years old                | 6  |

**Eligible**  
503

**Incomplete questionnaire**  
2

**Included in analysis**  
501
